# Supplementary material for: Molecularly imprinted electrospun nanofibers for adsorption of 2,4-dinitrotoluene in water
Source: Royal Society of Chemistry journal article supplement (doi:10.1039/c8an00734a), 2018-01-01
Supplement: c8an00734a1.pdf [file c8an00734a1.pdf]

## Electronic Supplementary Information (ESI)

### Molecularly imprinted electrospun nanofibers for adsorption of 2,4-dinitrotoluene in water

Xiaoting Xue, Rui Lu\*, Yi Li, Qing Wang, Jiansheng Li and Lianjun Wang\*

Jiangsu Key Laboratory of Chemical Pollution Control and Resources Reuse, School of Environmental and Biological Engineering, Nanjing University of Science & Technology, Nanjing 210094, China

#### \*Corresponding Authors:

Dr. Rui Lu, Email: [rlu@njust.edu.cn](mailto:rlu@njust.edu.cn);

Prof. Lian-Jun Wang, Email: [wanglj@mail.njust.edu.cn](mailto:wanglj@mail.njust.edu.cn).

**Table S1:** The quality of nanofibers with different PAM mass fraction

| PAM mass fraction    | 0%   | 5%   | 10%  | 20%  |
|----------------------|------|------|------|------|
| Before in water (mg) | 4.89 | 5.40 | 5.24 | 5.70 |
| After in water (mg)  | 5.07 | 5.39 | 5.15 | 5.69 |

**Table S2:** DNT adsorption capacity with different ratio of PAM and DNT

| <u>PAM:DNT</u> | <u>Binding Amount (mg/g)</u> |
|----------------|------------------------------|
| 1:0            | 3.92                         |
| 1:0.25         | 4.40                         |
| 1:0.33         | 5.22                         |
| 1:0.5          | 5.43                         |
| 1:1            | 5.78                         |
| 1:4            | 5.27                         |
| 1:8            | 5.25                         |

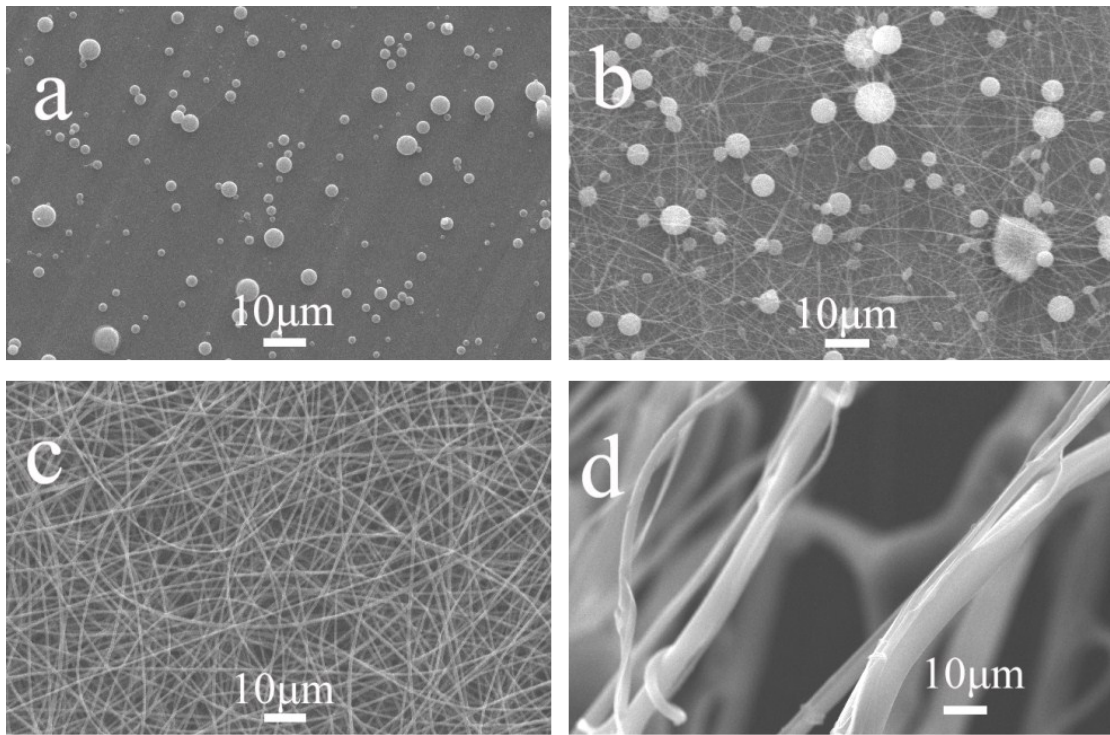

**Figure S1:** SEM micrographs of electrospun nanofibers from a solution consisting of different PET concentrations: (a) 5%; (b) 10%; (c) 20%; (d) 30%.

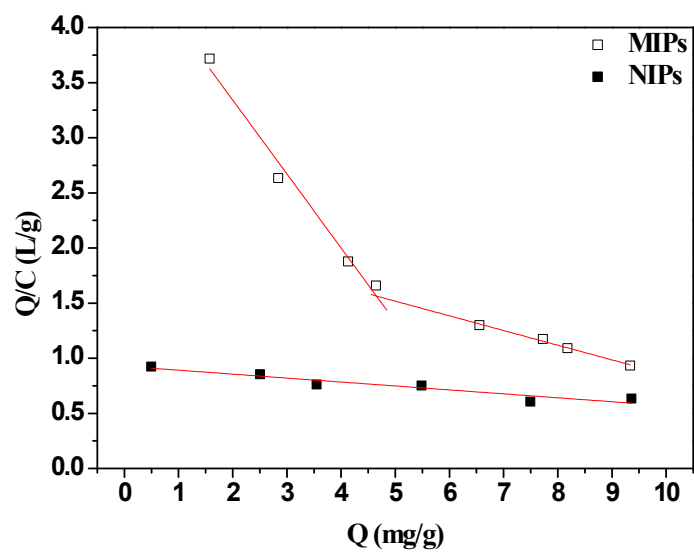

**Figure S2:** Scatchard plot of MIPs and NIPs to DNT
